# Supplementary material for: Minimal Size of Cell Assemblies Coordinated by Gamma Oscillations
Source: PLOS journal article supplement (doi:10.1371/journal.pcbi.1002362), 2012-02-09
Supplement: S1 (10.1371/journal.pcbi.1002362.s001) [file journal.pcbi.1002362.s001]

301 Moved Permanently

# Moved Permanently

The document has moved here.

---

Apache Server at www.ploscompbiol.org Port 80
